# Supplementary material for: Biochemical, thermodynamic and structural studies of recombinant homotetrameric adenylosuccinate lyase fromLeishmania braziliensis
Source: Royal Society of Chemistry journal article supplement (doi:10.1039/c7ra10526f), 2017-01-01

## Supplementary Data

### Biochemical, thermodynamics and structural studies of recombinant homotetrameric adenylosuccinate lyase from *Leishmania braziliensis*

Luiza Galina<sup>a,b</sup>, Pedro Ferrari Dalberto<sup>a,b</sup>, Leonardo Kras Borges Martinelli<sup>a</sup>, Candida Deves Roth<sup>a</sup>, Antonio Frederico Michel Pinto<sup>a</sup>, Anne Drumond Villela<sup>a</sup>, Cristiano Valim Bizarro<sup>a,b</sup>, Pablo Machado<sup>a,b</sup>, Luis Fernando Saraiva Macedo Timmers<sup>b,c</sup>, Osmar Norberto de Souza<sup>a,b,c</sup>, Edgar Marcelino de Carvalho Filho<sup>d</sup>, Luiz Augusto Basso<sup>a,b,\*</sup> and Diogenes Santiago Santos<sup>a,b</sup>

<sup>a</sup>Centro de Pesquisas em Biologia Molecular e Funcional (CPBMF), Instituto Nacional de Ciência e Tecnologia em Tuberculose (INCT-TB), Pontifícia Universidade Católica do Rio Grande do Sul (PUCRS), 6681/92-A, TecnoPuc, Av. Ipiranga 6681, 90619-900, Porto Alegre, RS, Brazil.

<sup>b</sup>Programa de Pós-Graduação em Biologia Celular e Molecular, PUCRS, Porto Alegre, RS, Brazil.

<sup>c</sup>Laboratório de Bioinformática, Modelagem e Simulação de Biosistemas (LABIO), Pontifícia Universidade Católica do Rio Grande do Sul (PUCRS), Av. Ipiranga 6681, 90619-900, Porto Alegre, RS, Brazil.

<sup>d</sup>Hospital Universitário Professor Edgard Santos, Universidade Federal da Bahia, Salvador 40110160, BA, Brazil

## Table of contents

1. **Figure S1:** SDS-PAGE (12 %) analysis of recombinant *Lb*ASL (~ 51 kDa) homogeneous protein.
2. **Table S1:** Purification of recombinant *Lb*ASL expressed in *E. coli* BL21(DE3) cells. Typical purification protocol from 1.8 g wet cell paste.
3. **Figure S2:** Representation of the peptides identified by mass spectrometry.
4. **Figure S3:** Determination of the oligomeric state of *Lb*IU-NH by gel filtration using a HighLoad 10/30 Superdex-200 column.
5. **Figure S4:** ITC analysis of *Lb*ASL titration with fumarate showed no heat change.

**Figure S1.** SDS–PAGE (12%) analysis of recombinant *Lb*ASL (~ 51 kDa) using the three step purification protocol that yielded homogeneous protein. Lane 1: Molecular Weight Protein Marker; Lane 2 – Crude Extract; Lane 3 – Treated with ammonium sulfate 1.5 M; Lane 4 – Superdex 200 eluted; Lane 5 – Q Sepharose HP eluted and dialyzed against the 50 mM potassium phosphate buffer pH 7.0, containing 150 mM KCl, 1 mM EDTA, 1 mM DTT and 10 % glycerol.

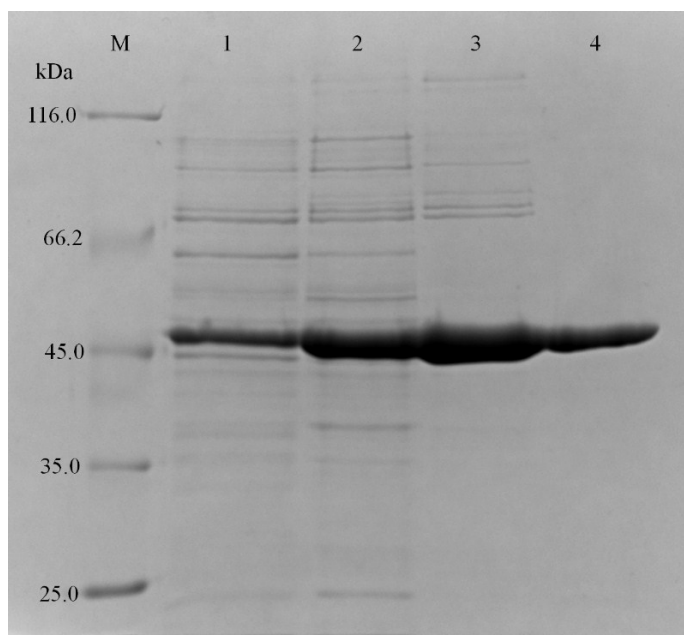

**Table S1.** Purification of recombinant *Lb*ASL expressed in *E. coli* BL21(DE3) cells.

Typical purification protocol from 1.8 g wet cell paste.

| <b>Purification step</b> | <b>Total protein (mg)</b> | <b>Total enzyme activity (U)</b> | <b>Specific activity (U mg<sup>-1</sup>)</b> | <b>Purification fold</b> | <b>Yield (%)</b> |
|--------------------------|---------------------------|----------------------------------|----------------------------------------------|--------------------------|------------------|
| Crude extract            | 723.96                    | 228.06                           | 0.32                                         | 1.00                     | 100              |
| Ammonium Sulfate         | 137.60                    | 465.09                           | 3.38                                         | 10.73                    | 204              |
| Superdex 200 eluate      | 43.20                     | 1.30                             | 0.03                                         | 0.09                     | 1                |
| Q Sepharose HP eluate    | 18.70                     | 90.32                            | 4.83                                         | 15.33                    | 40               |

<sup>a</sup>One unit (U) of enzyme in this table is given as the amount of *Lb*ASL that converts 1  $\mu$ mol of S-AMP into AMP and fumarate per second at pH 7.5 at 25 °C.

**Figure S2.** Representation of amino acid sequence coverage of recombinant *Lb*ASL. *Lb*ASL protein identify was confirmed by the identification of 189 unique peptides (yellow bars) covering 100% of the protein sequence (456 amino acid residues represented in blue).

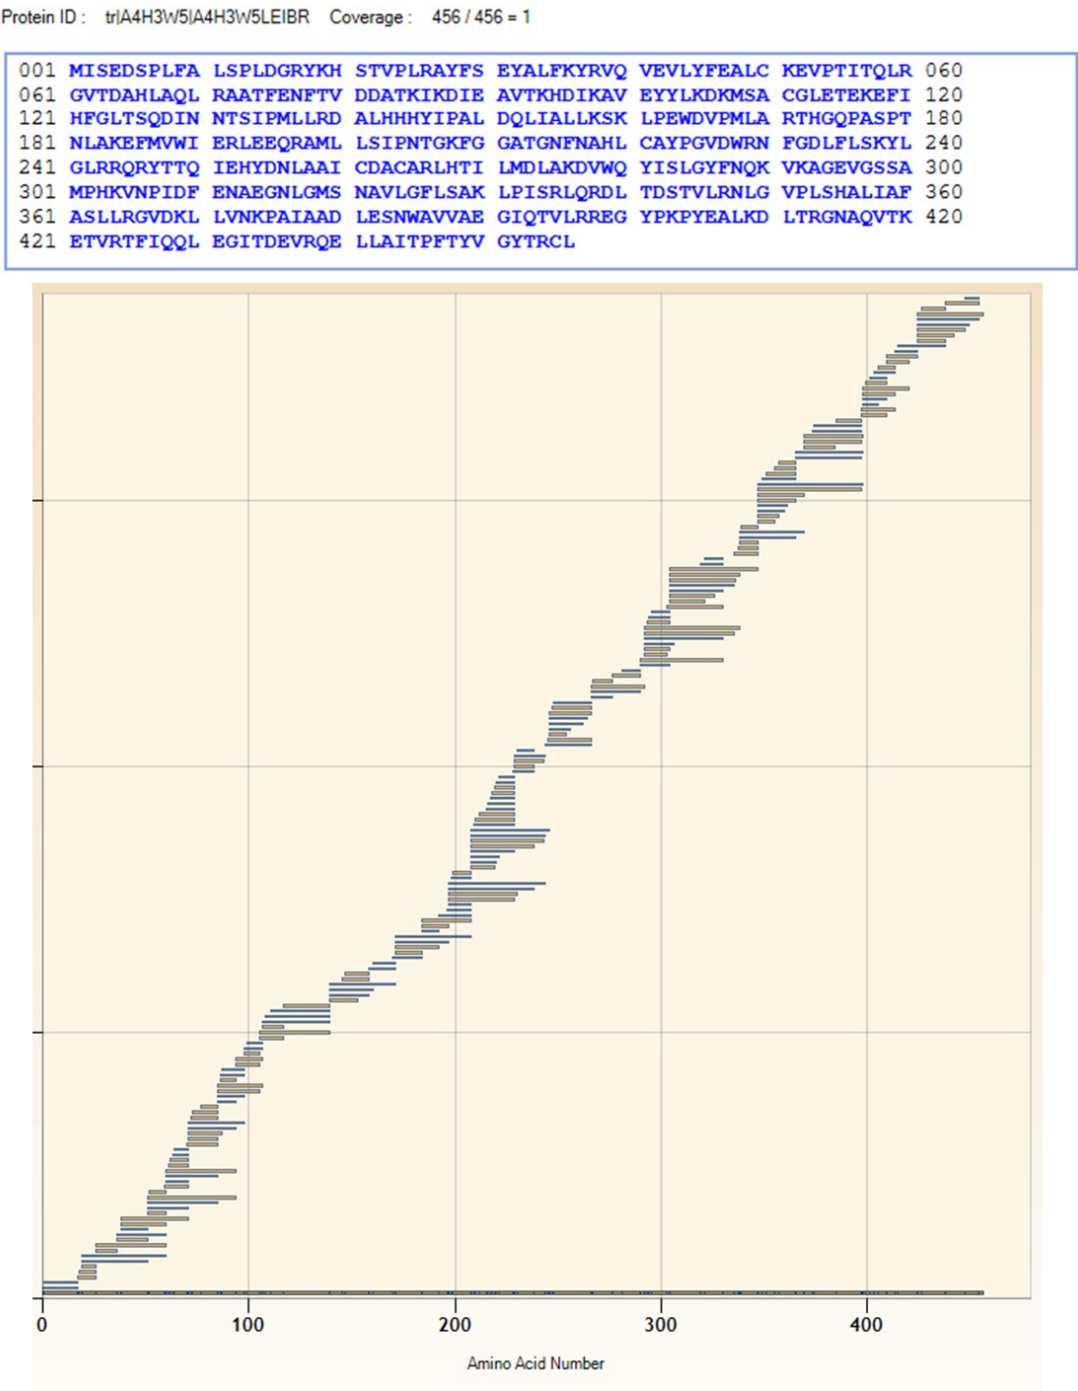

**A**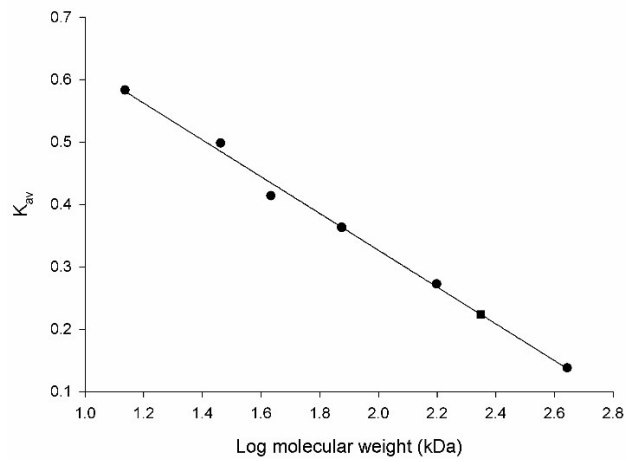**B**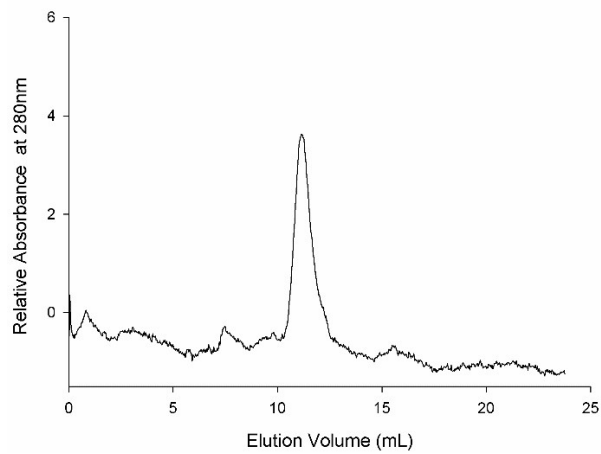

**Figure S3.** Determination of the oligomeric state of *LbASL* by gel filtration using a HighLoad 10/30 Superdex-200 column. (A) Protein standards (●) were: ferritin, aldolase, conalbumin, ovalbumin, ribonuclease A and carbonic anhydrase. Blue dextran 2000 was used to determine the void volume.  $K_{av}$  was determined using Eq. 1 (main text) for each standard, and these values were plotted against logarithm of the molecular mass of protein standards. A value of 223,357 for the apparent molecular mass of homogeneous recombinant protein (■) was estimated suggesting that *LbASL* is a tetramer in solution. (B) *LbASL* protein elution profile at 280 nm.

**Figure S4.** ITC analysis of *Lb*ASL titration with fumarate. The top panel shows raw data of the heat pulses resulting from titration of *Lb*ASL. The bottom panel shows the integrated heat pulses, normalized per mole of injection as a function of the molar ratio (ligand concentration/*Lb*ASL subunit concentration). Data were best fitted to one binding site model.

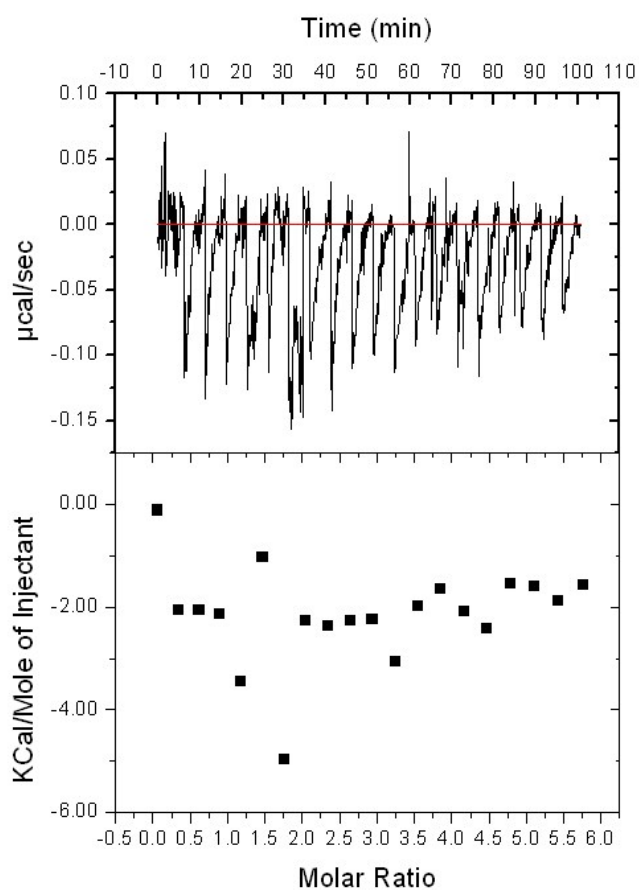

Supplement: c7ra10526f1.pdf [file c7ra10526f1.pdf]
